# Supplementary material for: Biopolymer from Water Kefir as a Potential Clean-Label Ingredient for Health Applications: Evaluation of New Properties
Source: MDPI journal article supplement (doi:10.3390/molecules27123895), 2022-06-17
Supplement: s1 [file s1]

# Biopolymer from Water Kefir as a Potential Clean-Label Ingredient for

## Health Applications: Evaluation of New Properties

### Supplementary Materials

#### 2.2 Evaluation of the growth rate (GGR) of water kefir grains

$$GGR (\%) = \frac{\text{Final grain mass} - \text{Initial grain mass}}{\text{Initial grain mass}} \times 100 \quad (\text{Eq.S1})$$

#### 2.6 Functional properties

##### 2.6.1 Emulsifying ability (EA) and emulsifying stability (ES)

$$EA (\%) = \frac{\text{Initial emulsion volume}}{\text{Total volume}} \times 100 \quad (\text{Eq.S2})$$

$$ES (\%) = \frac{\text{Final emulsion volume}}{\text{Initial emulsion volume}} \times 100 \quad (\text{Eq.S3})$$

##### 2.6.2 Water holding capacity (WHC)

$$WHC (\%) = \frac{\text{Sample mass after water absorption}}{\text{Dry sample mass}} \times 100 \quad (\text{Eq.S4})$$

##### 2.6.3 Water solubility (Sol)

$$Sol (\%) = \frac{\text{Supernatant mass after drying}}{\text{Dry sample mass}} \times 100 \quad (\text{Eq.S5})$$

##### 2.6.4 Foaming ability (FA) and foam stability (FS)

$$FA (\%) = \frac{\text{Initial foam volume}}{\text{Total suspension volume}} \times 100 \quad (\text{Eq.S6})$$

$$FS (\%) = \frac{\text{Final foam volume}}{\text{Total suspension volume}} \times 100 \quad (\text{Eq.S7})$$

### 2.6.5 Swelling index

$$Int (g/g) = \frac{\text{Mass of swollen sample} - \text{Mass of dried sample}}{\text{Mass of dried sample}} \quad (\text{Eq.S8})$$

### 2.7 Photostability study

$$\% \text{ photodegradation} = [(A_0 - A_1)/A_0] \times 100 \quad (\text{Eq.S9})$$

Where:  $A_0$  is the absorbance at the wavelength at the initial time, and  $A_1$  is the absorbance at the wavelength at the irradiation time.

$$\eta_{sp} = \eta_{rel} - 1 \quad (\text{Eq.S10})$$

$$\eta = \frac{\sqrt{2}}{C} (\eta_{sp} - \ln \eta_{rel})^{1/2} \quad (\text{Eq.S11})$$

Where  $sp$  and  $rel$  correspond to the specific and relative viscosity, respectively, and  $C$  corresponds to the concentration in g. dL<sup>-1</sup>.

**Table S1.** Functional properties of EPSwk.

| Functional properties | Results          |
|-----------------------|------------------|
| Sol (%)               | $53.7 \pm 2.0$   |
| EA (%)                | $89.3 \pm 4.0$   |
| ES (%)                | $83.6 \pm 1.8$   |
| WHC (%)               | $704.7 \pm 53.3$ |
| FA (%)                | $26.7 \pm 2.9$   |
| FS (%)                | $18.3 \pm 4.0$   |
| Int (g/g)             | $43.1 \pm 16.0$  |

Sol - water solubility; EA - emulsifying ability; ES - emulsifying stability; WHC - water holding capacity; FA - foaming ability; FS - form stability; Int. - swelling index.

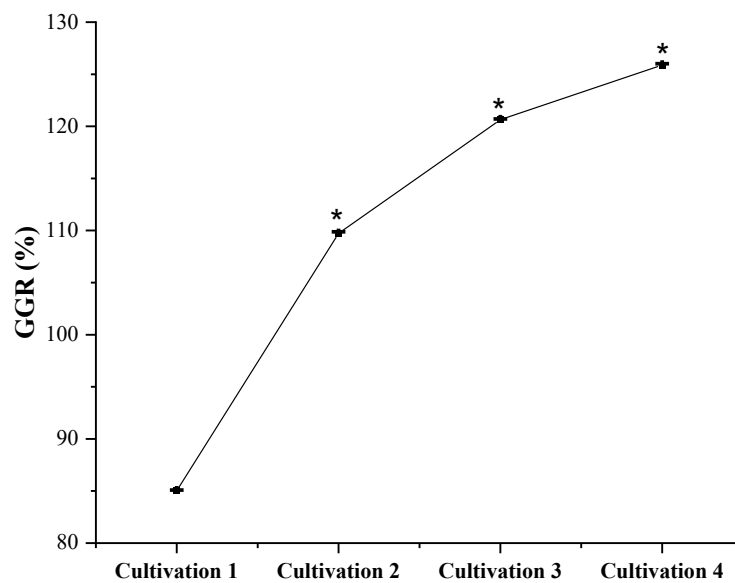

**Figure S1.** Monitoring the growth rate of water kefir grains in natura. \*  $p < 0.05$  compared to Cultivation 1 by the *Student's t-test*.

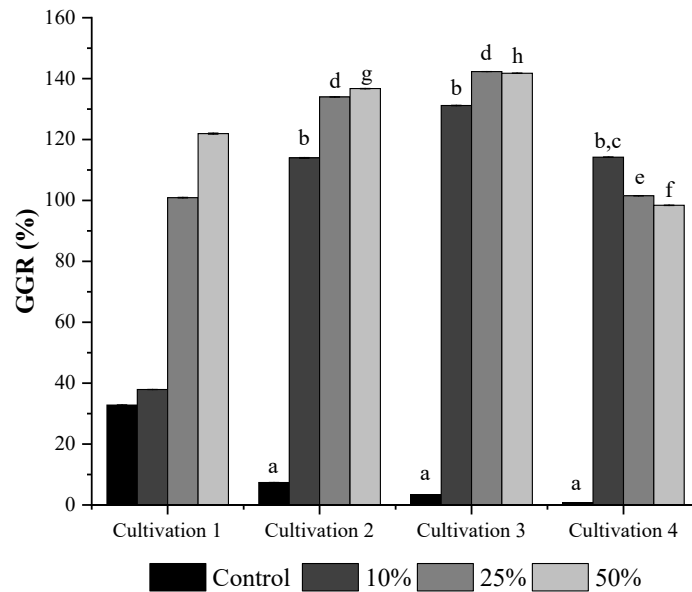

**Figure S2.** Monitoring the growth rate of water kefir grains after the freezing process with the addition of different concentrations of glycerol. a)  $p < 0.05$  compared to control of the cultivation 1 by the *Student's t-test*. b)  $p < 0.05$  compared to 10% glycerol of the cultivation 1 by the *Student's t-test*. c)  $p < 0.05$  compared to 10% glycerol between cultivations 3 and 4 by the *Student's t-test*. d)  $p < 0.05$  compared to 25% glycerol of the cultivation 1 by the *Student's t-test*. e)  $p < 0.05$  compared to 25% glycerol among cultivations 2 and 3; 2 and 4; and 3 and 4 by the *Student's t-test*. f)  $p < 0.05$  compared to 50% glycerol between cultivation 1 and 4 by the *Student's t-test*. g)  $p < 0.05$  compared to 50% glycerol between cultivations 2 and 4 by the *Student's t-test*. h)  $p < 0.05$  compared to 50% glycerol between cultivations 3 and 4 by the *Student's t-test*.

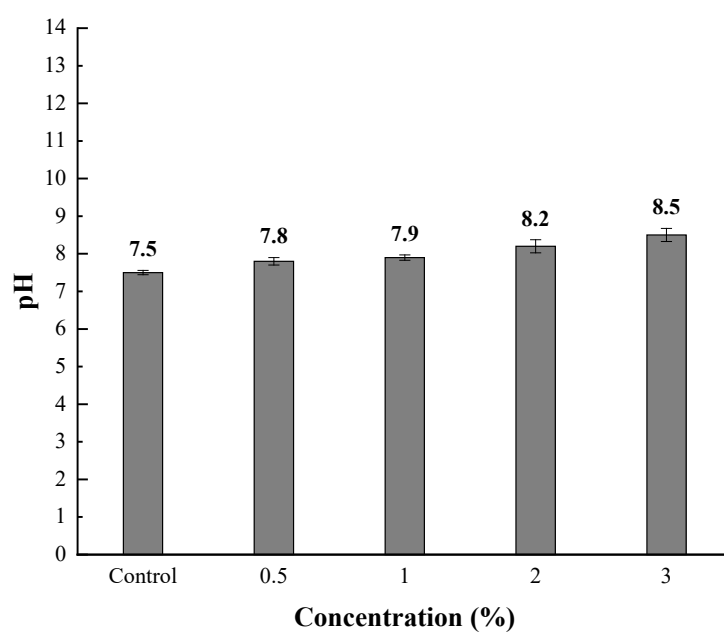

**Figure S3.** pH values of EPSwk in different concentrations.

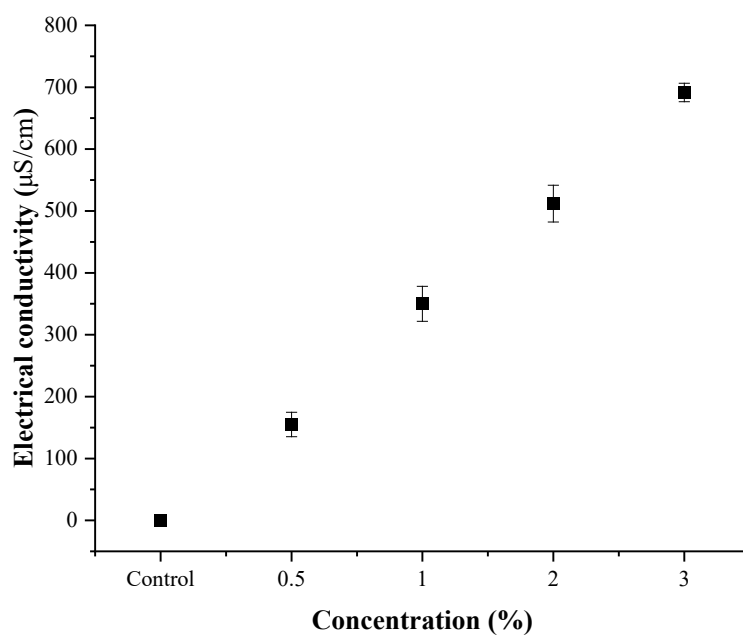

**Figure S4.** Electrical conductivity of EPSwk in different concentrations.

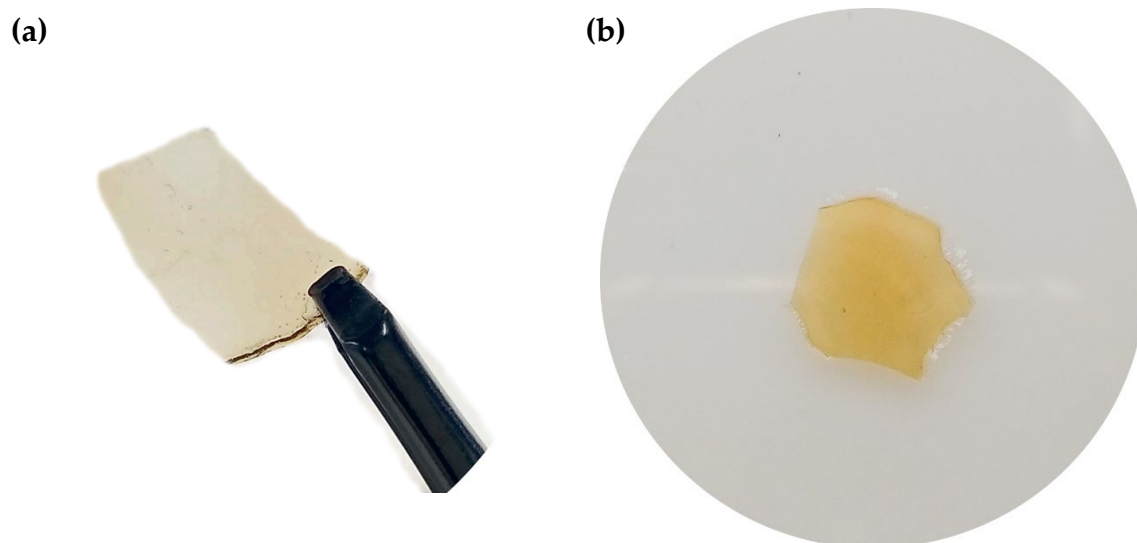

**Figure S5.** (a) Film of EPSwk without the addition of plasticizer. (b) Film of EPSwk with 10% of glycerol.

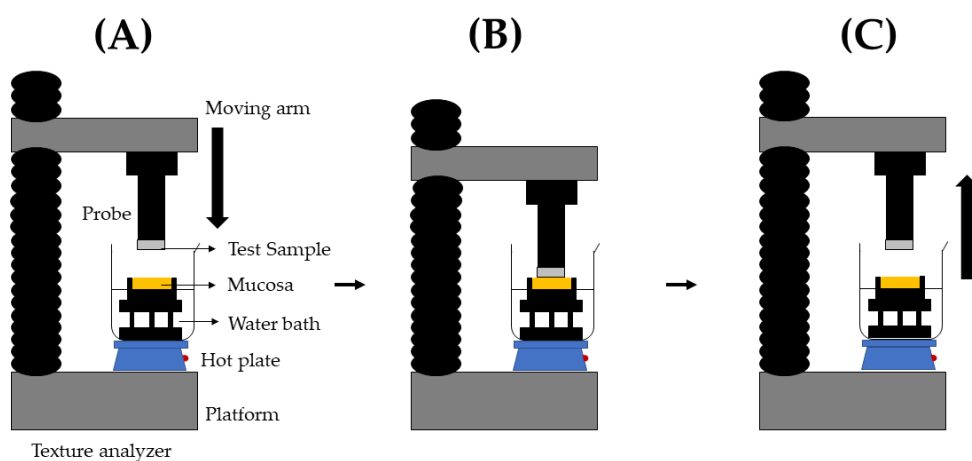

**Figure S6.** Schematic diagram of the mucoadhesiveness test by the texture analyzer. (A) The probe with the sample was moved downward; (B) The sample was attached to porcine buccal mucosa; (C). The probe moves up at a specified speed.

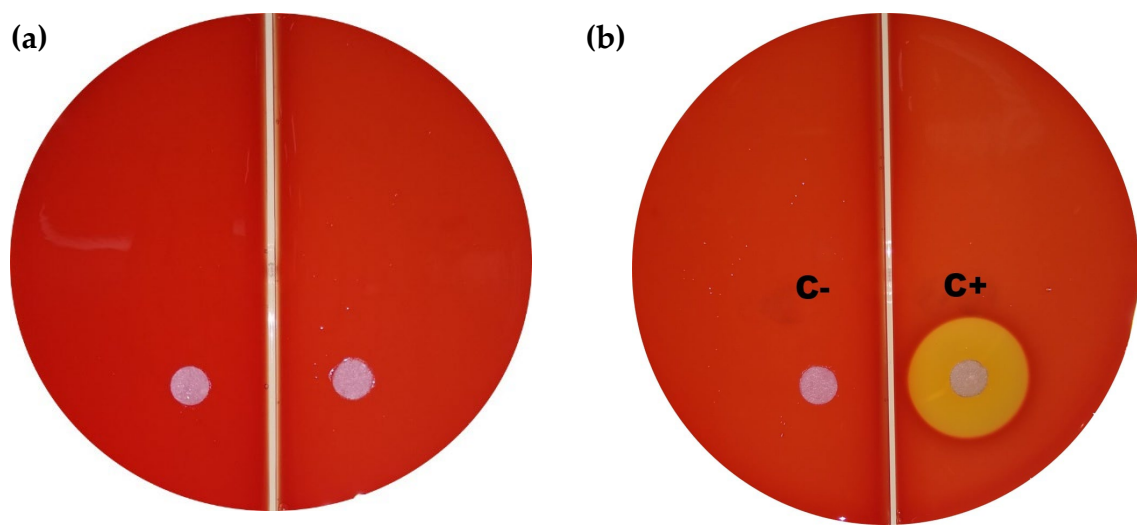

**Figure S7. (a)** Hemocompatibility analysis of EPSwk. **(b)** Negative and positive controls.
